# Supplementary material for: Synthesis, characterization and biological evaluation of cationic hydrazone copper complexes with diverse diimine co-ligands
Source: Royal Society of Chemistry journal article supplement (doi:10.1039/c4ra11716f), 2014-11-10
Supplement: c4ra11716f1.pdf [file c4ra11716f1.pdf]

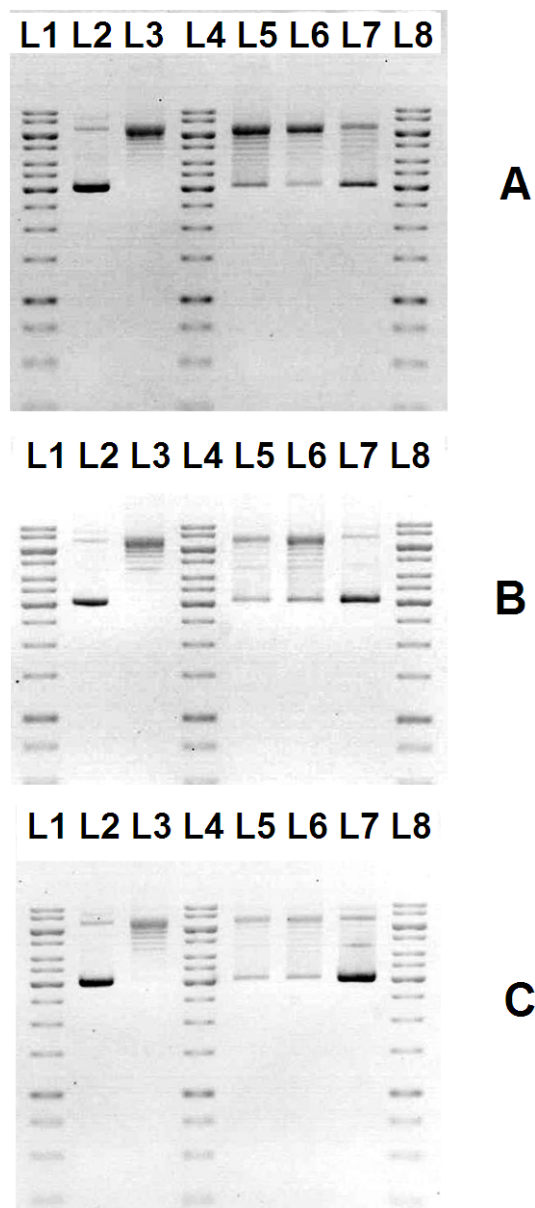

**Fig. S1:** Effect of sequence of mixing for the human topoisomerase I inhibition assay of complexes **2**, **3** and **4**. The gel images from **A-C** are for complexes **2**, **3** and **4**. Electrophoresis results of incubating human topoisomerase I (0.25 unit/20  $\mu$ L) with pBR322: Lane 1, 4 and 8, gene ruler 1 Kb DNA ladder; Lane 2, DNA alone (control); Lane 3, DNA + 1 unit human topoisomerase I (control); Lane 5, DNA + 30  $\mu$ M complex + 1 unit human topoisomerase I, all components mixed at the same time; Lane 6, DNA + 30  $\mu$ M complex + 1 unit human topoisomerase I, DNA + complex incubated for 30 mins first before the addition of topo I; Lane 7, DNA + 30  $\mu$ M complex + 1 unit human topoisomerase I, complex + topo I incubated for 30 mins first before DNA is added.
